# Supplementary material
Source: publisher figshare collection journal article supplement (https://gsapubs.figshare.com/ndownloader/files/35842469)
Supplement: Supplementary file 1 [file 35842469]

## Sheet: Sheet1
			wt% (2SD)																				ppm (2SD)
			SiO2		TiO2		Al2O3		Fe2O3		MnO		MgO		CaO		Na2O		K2O		P2O5		Rb		Ba		Th		U		Ta		Nb		La		Ce		Pb		Pr		Sr		Nd		Zr		Hf
	Izu-Oshima O58 tephra pumice	O58-1	77.35	2.10902	0.162815	0.0368933	12.4493	1.12194	1.30991	0.178174	0.0798567	0.0149244	0.173041	0.0468296	1.38761	0.338192	5.79407	0.673532	1.26072	0.300818	0.0350277	0.0234415	16.1492	3.93979	581.939	32.5195	0.797111	0.162434	0.432265	0.158531	0.0704978	0.0930419	0.937269	0.175746	5.41022	0.635598	15.6182	1.60102	6.55153	1.38046	2.49901	0.292744	78.8785	30.1788	12.8331	2.11841	130.398	12.3832	4.39543
		O58-2	77.9	1.2417	0.161351	0.0326504	12.033	0.66992	1.36472	0.413952	0.0775353	0.00436699	0.177913	0.0336084	1.29837	0.134049	5.74743	0.504871	1.19789	0.143552	0.0375542	0.025238	15.4068	1.44027	615.469	46.4158	0.89184	0.359178	0.463209	0.0709864	0.0964363	0.0858778	0.951372	0.246122	5.47746	0.68976	16.0129	1.7281	6.01011	0.920254	2.56267	0.517882	75.6774	9.67316	13.1902	1.84154	134.584	12.1097	4.33476
		O58-3	77.84	0.860633	0.151824	0.0677329	12.0524	0.520644	1.33915	0.114781	0.0817008	0.0118415	0.172559	0.0528577	1.21226	0.0871042	5.80098	0.404382	1.31106	0.138713	0.0341455	0.0227913	16.3878	0.839413	615.333	23.2155	0.841903	0.177223	0.492665	0.130091	0.0674291	0.0378902	0.951304	0.255237	5.65419	0.680076	16.1012	0.892295	6.2382	3.69006	2.42683	0.407273	70.4439	4.6481	13.1124	1.394	133.967	6.5326	5.0782
		O58-4	75.51	0.589976	0.160964	0.0223341	12.4802	0.614141	1.36786	0.113389	0.0806604	0.0071749	0.178055	0.0358681	1.27544	0.114789	5.66772	0.266016	1.24465	0.1298	0.0352818	0.0127608	16.2671	1.18082	617.098	29.5293	0.874738	0.162448	0.540239	0.216297	0.0741548	0.0535273	0.911982	0.195059	5.898	0.51485	16.3606	1.55914	6.25065	1.90909	2.66061	0.295343	74.1016	3.21827	12.8028	2.18651	139.669	7.31639	4.14371
	Toshima O3T tephra pumice	13110101-1	77.95	0.811139	0.149816	0.0283354	12.2046	0.429768	1.33012	0.0930069	0.0767787	0.00559964	0.164846	0.0122663	1.22666	0.110261	5.59924	0.289698	1.26268	0.176023	0.0354077	0.00857775	15.948	1.52597	595.796	37.4462	0.847871	0.192254	0.423063	0.0783694	0.10467	0.047911	0.997855	0.205081	5.48929	0.595149	16.1613	1.30897	6.83114	0.704943	2.52701	0.351875	70.9898	6.39547	12.9505	1.84745	131.094	11.1883	3.87412
		13110101-1-2	76.49	2.59812	0.150016	0.0458211	13.0094	1.97097	1.3486	0.418762	0.0788356	0.0344462	0.17397	0.0695564	1.62513	0.93301	5.91197	0.446325	1.17182	0.317578	0.0355433	0.0183549	14.7631	4.53245	541.488	106.037	0.743327	0.26726	0.460596	0.137787	0.0857114	0.0471161	0.86467	0.306003	5.35219	1.32294	14.8156	2.80314	6.14985	1.94001	2.45193	0.606697	92.4769	61.0017	11.2221	2.72056	126.519	31.2764	3.94831
	Oomuro Hole lava	HD719-R05	77.27		0.192108		12.9816		1.39023		0.097076		0.188021		1.66051		5.10313		1.06477		0.0490489		15.3081		605.773		0.742835		0.442733		0.0727357		0.854353		5.28703		14.9533		6.96971		2.30572		102.556		12.0818		138.277		3.66612
[truncated: 35 more columns]
